# Supplementary material
Source: Springer Nature journal article supplement (https://www.springermedizin.de/resource/supplementary/12913_2013_3170_MOESM4_ESM.pdf/9532588)
Supplement: MOESM4 [file 9532588]

## Local Interaction Patterns

## Emergent Characteristics

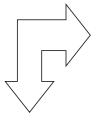

### Opportunities for Interaction

Examples:

- Chance encounters
- Rounds
- Meetings
- Shift report
- Lunch breaks

### Exchange Information:

- Listen
- Give information
- Receive information
- Explain
- Verify meaning

### Connect:

- Be Approachable
- Pitch-in
- Seek assistance
- Reciprocate
- Coach/Mentor
- Show appreciation
- Give respect
- Say thank you
- Give praise

### Cognitive Diversity:

- Pay Attention
- Ask questions
- Give feedback
- Receive feedback
- Suggest alternatives
- Sensemaking

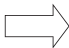

### Work Environment

- Reciprocity
- Respect
- Teamwork
- Learning
- Better care processes (e.g., planning, decision making)

### Individual Staff

- Feeling good
- Confidence
- Satisfaction

### Resident Care

- Better quality
- Patient safety
- Better health outcomes
- Improved quality of life
